# Supplementary material for: Neurocognitive profile in major depressive disorders: relationship to symptom level and subjective memory complaints
Source: BMC Psychiatry. 2016 Apr 19;16:108. doi: 10.1186/s12888-016-0815-8 (PMC4837617; doi:10.1186/s12888-016-0815-8)
Supplement: Additional file 1: — Mohn Rund BMC Psych 2016. (XLSX 15 kb) [file 12888_2016_815_MOESM1_ESM.xlsx]

## Sheet: Sheet1
age	education	diagnosis	depyears	ectprev	madrs	emq	tmt-t	bacs-t	hvlt-t	wms-t	lns-t	mazes-t	bvmt-t	flu-t	msceit-t	cpt-t	speed-t	workmem-t	comp-t	medication	adep1	adep2	aps1	aps2	lithium	aconvuls
29	2	1	15	0	38	133	56.09	53.13	48.82	54.85	39.02	48.89	65.13	45	59.08	44.83	51.41	46.93	51.48				75
37	2	1	25	0	36	81	53.39	64.08	52.61	58.22	52.32	63.84	57.6	57.43	46.26	55.25	58.3	55.27	56.1		150		25			33
32	3	1	15	0	29	106	50.69	56.5	54.51	54.85	35.69	38.01	56.09	46.38	67.23	35.23	51.19	45.27	49.52		50				50
33	3	1	12	0	42	66	36.63	43.02	45.03	41.37	35.69	35.29	42.54	47.76	41.6	44.22	42.47	38.53	41.32		100
24	1	1	5	0	18	85	60.42	51.44	54.51	48.11	68.94	57.04	59.11	46.38	61.41	59.75	52.75	58.53	56.71				15
51	3	1	8	0	15	108	55.55	56.5	67.78	48.11	52.32	47.53	50.07	67.1	60.24	34.41	59.71	50.21	53.96		150				100	67
57	3	1	13	0	23	181	35.55	43.02	46.93	48.11	58.97	47.53	48.56	53.29	50.92	56.48	43.95	53.54	48.94
45	3	1	18	0	26	80	54.47	53.97	54.51	54.85	65.62	43.45	54.59	57.43	34.61	65.27	55.29	60.23	53.88		100		25			33
28	3	1	5	0	22	125	50.69	51.44	54.51	64.96	48.99	51.61	68.14	51.9	47.43	45.65	51.34	56.98	53.53				50	100	100
66	1	1	3	0	32	9999	26.36	37.12	37.45	48.11	32.37	29.86	41.03	38.09	9999	9999	33.86	40.24	9999		150		25
59	1	1	5	0	25	139	39.34	37.97	56.4	44.74	45.67	31.22	36.51	57.43	46.26	9999	44.91	45.2	9999		150		50
53	1	1	12	0	37	27	39.88	43.86	35.56	44.74	45.67	40.73	25.97	27.04	29.95	9999	36.93	45.2	9999		100		50
48	2	1	35	0	42	190	40.96	35.44	39.35	44.74	35.69	44.81	51.57	43.62	41.6	9999	40.01	40.22	9999		100	100	150
58	3	1	5	0	37	145	40.42	41.34	33.66	61.59	48.99	39.37	45.55	57.43	39.27	9999	46.39	55.29	9999		100		100	87
40	2	1	5	0	39	74	44.74	44.7	45.03	27.89	45.67	32.58	39.52	42.24	28.79	41.76	43.89	36.78	39.29							80
48	2	1	35	0	38	70	31.23	33.76	45.03	44.74	48.99	46.17	44.04	40.86	31.12	45.03	35.28	46.87	41.1
50	1	1	25	0	26	98	32.85	37.12	56.4	41.37	65.62	33.94	44.04	54.67	52.09	42.38	41.55	53.49	46.05				25
59	1	1	35	1	35	104	42.58	38.81	43.14	41.37	45.67	38.01	41.03	40.86	57.91	9999	40.75	43.52	9999		150
49	3	1	30	1	46	60	55.01	51.44	58.3	54.85	45.67	52.97	45.55	47.76	38.11	43.6	51.41	50.26	49.33				75
54	1	1	14	0	36	104	19.34	38.81	50.72	38	68.94	29.86	22.96	60.19	43.93	43.6	39.45	53.47	41.63		50		100
52	1	1	40	0	34	144	51.77	48.07	60.19	51.48	48.99	50.25	63.62	45	38.11	9999	48.28	50.24	9999		200		25
59	2	1	15	0	35	67	52.85	47.23	33.66	38	48.99	42.09	51.57	49.14	47.43	27.46	49.74	43.5	43.84		200
51	3	1	30	0	32	107	33.93	38.81	50.72	38	48.99	33.94	42.54	50.52	50.92	43.4	41.09	43.5	43.18		50
38	3	1	12	1	36	79	54.47	50.6	65.88	54.85	35.69	63.84	63.62	62.95	45.1	63.02	56.01	45.27	56		300		150	25		33
52	2	1	40	1	31	150	56.63	52.28	41.24	44.74	42.34	58.4	48.56	64.33	53.25	52.8	57.75	43.54	51.46		150	150
54	2	1	20	0	42	95	50.15	43.02	50.72	48.11	48.99	55.68	47.06	46.38	42.77	36.66	46.52	48.55	46.95		100	225	75
43	1	1	32	0	41	118	52.85	21.96	33.66	34.63	29.04	43.45	33.5	22.9	9999	9999	32.57	31.84	9999		100		25	50
49	2	1	10	0	30	102	56.63	55.65	50.72	48.11	48.99	59.76	56.09	43.62	57.91	38.09	51.97	48.55	51.56		100	100
44	2	1	12	0	45	62	17.72	24.49	24.18	14.41	15.74	31.22	24.46	21.52	9999	9999	21.24	15.08	9999				25
56	3	1	17	0	29	145	32.85	38.81	41.24	31.26	48.99	31.22	44.04	38.09	41.6	66.7	36.58	40.13	41.48		300					100
47	2	1	9999	0	35	70	53.39	37.97	37.45	54.85	52.32	55.68	41.03	32.57	38.11	36.66	41.31	53.58	44		150
43	2	1	25	0	45	66	52.85	43.86	33.66	51.48	55.64	63.84	42.54	35.33	49.76	51.98	44.01	53.56	48.09				50
28	1	1	16	1	28	148	57.71	50.6	54.51	48.11	58.97	62.48	54.59	45	46.26	50.76	51.1	53.54	52.9		50
30	2	0		0			62.04	53.97	48.82	54.85	42.34	59.76	47.06	53.29	39.27	48.1	56.43	48.6	50.95
37	2	0		0			56.63	52.28	52.61	61.59	45.67	63.84	54.59	54.67	39.27	52.8	54.53	53.63	53.4
31	3	0		0			60.96	75.87	69.67	64.96	58.97	63.84	66.64	67.1	50.92	67.11	67.97	61.96	64.6
33	3	0		0			60.96	55.65	73.46	64.96	45.67	62.48	59.11	57.43	59.08	44.22	58.01	55.31	58.3
23	2	0		0			58.8	69.97	54.51	58.22	55.64	61.12	63.62	51.9	52.09	49.33	60.22	56.93	57.52
51	3	0		0			50.15	45.55	43.14	54.85	48.99	58.4	60.61	47.76	27.62	48.51	47.82	51.92	48.56
55	3	0		0			55.55	57.34	37.45	44.74	48.99	57.04	48.56	56.05	41.6	63.84	56.31	46.87	51.12
46	3	0		0			53.39	53.13	50.72	58.22	52.32	57.04	48.56	62.95	50.92	53.21	56.49	55.27	54.05
28	3	0		0			54.47	69.97	56.4	58.22	52.32	50.25	44.04	54.67	66.06	52.39	59.7	55.27	55.88
66	1	0		0			56.63	48.92	31.77	34.63	48.99	48.89	44.04	54.67	46.26	53.62	53.41	41.81	46.84
61	2	0		0			59.88	59.02	63.98	51.48	42.34	58.4	51.57	53.29	50.92	67.92	57.39	46.91	55.88
53	1	0		0			54.47	58.18	60.19	51.48	48.99	48.89	57.6	60.19	62.57	65.06	57.61	50.24	56.76
48	2	0		0			56.63	65.76	54.51	58.22	52.32	51.61	54.59	67.1	64.9	54.64	63.16	55.27	58.03
58	3	0		0			43.66	54.81	48.82	41.37	39.02	55.68	50.07	50.52	57.91	44.83	49.67	40.19	48.67
39	2	0		0			57.17	62.39	52.61	51.48	52.32	51.61	53.08	46.38	50.92	48.51	55.31	51.9	52.65
48	2	0		0			42.04	50.6	63.98	64.96	65.62	47.53	54.59	60.19	61.41	50.55	50.94	65.29	56.15
51	1	0		0			51.23	52.28	48.82	51.48	65.62	52.97	56.09	46.38	48.59	43.6	49.96	58.55	51.71
62	1	0		0			50.69	56.5	60.19	48.11	48.99	55.68	47.06	50.52	54.42	47.9	52.57	48.55	52.01
50	3	0		0			53.93	53.13	48.82	61.59	62.29	48.89	50.07	56.05	46.26	34.82	54.37	61.94	51.58
55	1	0		0			52.85	47.23	37.45	34.63	42.34	38.01	31.99	46.38	60.24	47.28	48.82	38.49	43.84
52	1	0		0			52.85	53.13	58.3	44.74	55.64	50.25	45.55	61.57	63.74	33.59	55.85	50.19	51.94
59	2	0		0			54.47	51.44	54.51	64.96	62.29	58.4	65.13	60.19	63.74	57.91	55.37	63.63	59.3
51	3	0		0			59.34	61.55	56.4	58.22	55.64	55.68	60.61	56.05	62.57	56.27	58.98	56.93	58.23
38	3	0		0			59.34	59.86	60.19	54.85	62.29	54.33	59.11	67.1	42.89	61.38	62.1	58.57	58.13
52	2	0		0			50.15	48.07	52.61	54.85	45.67	61.12	47.06	51.9	57.91	29.71	50.04	50.26	49.91
54	2	0		0			57.17	55.65	41.24	48.11	55.64	55.68	59.11	45	61.41	54.23	52.61	51.88	53.32
44	1	0		0			48.53	44.7	52.61	48.11	48.99	44.81	54.59	42.24	54.42	56.68	45.16	48.55	49.57
49	2	0		0			53.39	49.76	41.24	44.74	42.34	43.45	60.61	53.29	60.24	47.69	52.14	43.54	49.68
43	2	0		0			55.01	45.55	52.61	61.59	55.64	51.61	51.57	49.14	47.43	52.39	49.9	58.62	52.25
57	2	0		0			56.63	47.23	62.09	48.11	58.97	48.89	36.51	38.09	60.24	59.14	47.32	53.54	51.59
46	2	0		0			56.63	60.71	52.61	68.33	68.94	57.04	48.56	42.24	45.1	51.17	53.19	68.64	55.13
43	2	0		0			53.93	57.34	52.61	54.85	48.99	62.48	57.6	42.24	47.55	58.32	51.17	51.92	53.59
28	1	0		0			60.42	55.65	46.93	54.85	48.99	59.76	57.6	53.29	62.57	68.33	56.45	51.92	56.84
